# Supplementary material for: Labeling lateral prefrontal sulci using spherical data augmentation and context-aware training
Source: PubMed Central journal article supplement — Neuroimage. Author manuscript; Available in PMC 2021 Aug 16. (PMC8366030; doi:10.1016/j.neuroimage.2021.117758), 2021-01-23
Supplement: NIHMS1728061-supplement-Lyu_NeuroImage_SupplementaryMaterials.pdf [file NIHMS1728061-supplement-Lyu_NeuroImage_SupplementaryMaterials.pdf]

## Labeling performance using combined tertiary sulci

**Table S.1**

3 combined tertiary sulci with individual components.

| Combined | Acronym | Region                                                     | Acronym | Region                                                        | Acronym | Region                                                    |
|----------|---------|------------------------------------------------------------|---------|---------------------------------------------------------------|---------|-----------------------------------------------------------|
| pmfs     | pmfs_p  | posterior component of the posterior middle frontal sulcus | pmfs_i  | intermediate component of the posterior middle frontal sulcus | pmfs_a  | anterior component of the posterior middle frontal sulcus |
| imfs     | imfs_h  | horizontal component of the intermediate frontal sulcus    | imfs_v  | vertical component of the intermediate frontal sulcus         |         |                                                           |
| fms      | mfms    | medial frontalmarginal sulcus                              | ifms    | intermediate frontalmarginal sulcus                           |         |                                                           |

**Table S.2**

Summary of average Dice overlap (mean  $\pm$  stdev.) in combined tertiary sulci for the pediatric and adult cohorts. Legend: significant improvement ( $p < .05$ ) for Non-rigid+Context\* (blue) compared to the baseline methods; significant improvement for Non-rigid or Non-rigid+Context\* (black) compared to the baseline methods.

|                   | Pediatric          |                    | Adult              |                    |
|-------------------|--------------------|--------------------|--------------------|--------------------|
|                   | Left               | Right              | Left               | Right              |
| Multi-atlas       | .3860 $\pm$ .1013* | .3779 $\pm$ .0856* | .4193 $\pm$ .0888* | .4250 $\pm$ .1101* |
| Naive             | .5449 $\pm$ .1287* | .5138 $\pm$ .1253* | .4011 $\pm$ .1179* | .3821 $\pm$ .1433* |
| Rotation          | .5954 $\pm$ .1483* | .5986 $\pm$ .1402* | .5790 $\pm$ .1149* | .5404 $\pm$ .1680* |
| Non-rigid         | .6269 $\pm$ .1388  | .6083 $\pm$ .1437  | .6156 $\pm$ .1489  | .5854 $\pm$ .1604  |
| Non-rigid+Context | .6539 $\pm$ .1260  | .6402 $\pm$ .1496  | .6617 $\pm$ .1091  | .6128 $\pm$ .1403  |

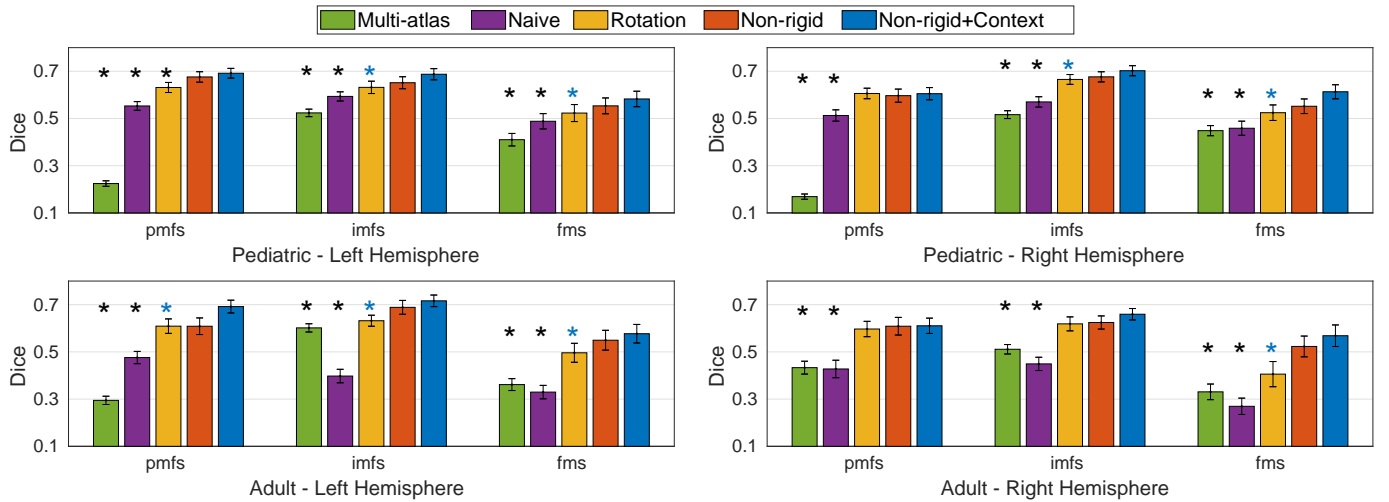

**Fig. S.1.** Dice overlap per combined tertiary sulcus in pediatric (*top*) and adult (*bottom*) cohorts. The statistical significance is reported after multi-comparison correction over the 3 sulci (FDR at  $q=.05$ ). The proposed data augmentation shows higher accuracy (Dice overlap) than the baseline methods. After the context-aware training, the Dice overlap is further improved compared to the conventional training with rotation data augmentation; left hemisphere: all sulci and right hemisphere: imfs and fms (pediatric) and fms (adult). Importantly, the proposed method does not perform worse than the baseline methods for any sulci. Legend: standard errors (hat); significant improvement compared to the baseline methods for Non-rigid+Context\* (blue); for Non-rigid or Non-rigid+Context\* (black).

## Spherical mapping distortion

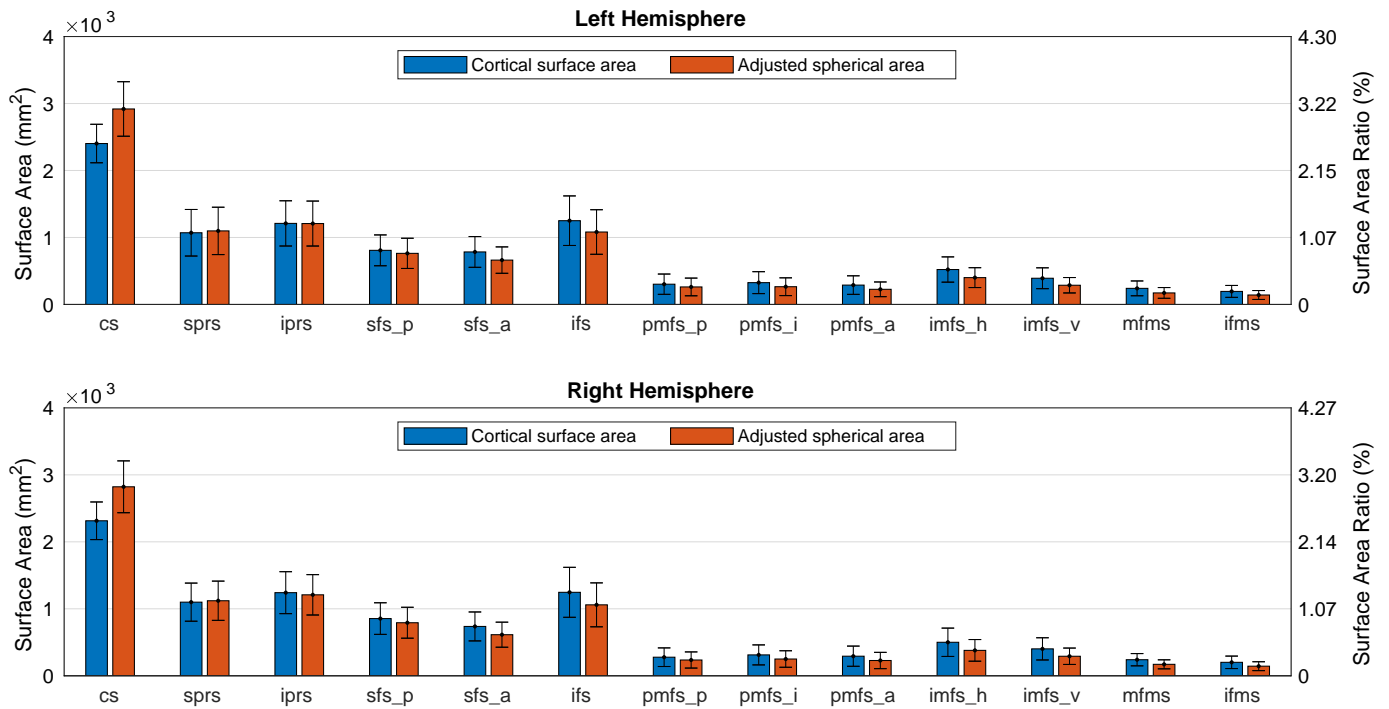

**Fig. S.2.** Area distortion by spherical mapping in pediatric and adult cohorts. For each hemisphere, total spherical area is scaled by its associated total cortical surface area for comparison. See Table S.3 for absolute area difference of individual sulci between before and after spherical mapping.

| Region | Left Hemisphere                |                        | Right Hemisphere               |                        |
|--------|--------------------------------|------------------------|--------------------------------|------------------------|
|        | Surface area ( $\text{mm}^2$ ) | Surface Area Ratio (%) | Surface area ( $\text{mm}^2$ ) | Surface Area Ratio (%) |
| cs     | 515.91 $\pm$ 156.23            | .5512 $\pm$ .1505      | 507.49 $\pm$ 137.52            | .5401 $\pm$ .1325      |
| sprs   | 47.97 $\pm$ 38.46              | .0508 $\pm$ .0389      | 49.74 $\pm$ 43.39              | .0527 $\pm$ .0469      |
| iprs   | 39.93 $\pm$ 32.74              | .0424 $\pm$ .0336      | 59.07 $\pm$ 38.10              | .0625 $\pm$ .0388      |
| sfs_p  | 51.95 $\pm$ 34.88              | .0559 $\pm$ .0378      | 66.87 $\pm$ 41.88              | .0718 $\pm$ .0450      |
| sfs_a  | 121.85 $\pm$ 50.57             | .1313 $\pm$ .0536      | 123.27 $\pm$ 41.41             | .1323 $\pm$ .0466      |
| ifs    | 168.87 $\pm$ 64.69             | .1815 $\pm$ .0670      | 186.90 $\pm$ 73.22             | .2000 $\pm$ .0777      |
| pmfs_p | 40.90 $\pm$ 25.25              | .0438 $\pm$ .0261      | 41.70 $\pm$ 24.82              | .0444 $\pm$ .0257      |
| pmfs_i | 60.73 $\pm$ 35.67              | .0652 $\pm$ .0381      | 61.50 $\pm$ 30.12              | .0657 $\pm$ .0321      |
| pmfs_a | 62.99 $\pm$ 31.92              | .0678 $\pm$ .0348      | 64.21 $\pm$ 31.35              | .0686 $\pm$ .0324      |
| imfs_h | 120.87 $\pm$ 47.00             | .1297 $\pm$ .0495      | 120.90 $\pm$ 54.66             | .1290 $\pm$ .0563      |
| imfs_v | 104.54 $\pm$ 43.73             | .1118 $\pm$ .0435      | 110.35 $\pm$ 46.40             | .1176 $\pm$ .0466      |
| mfms   | 68.16 $\pm$ 31.98              | .0729 $\pm$ .0327      | 68.91 $\pm$ 26.86              | .0742 $\pm$ .0303      |
| ifms   | 53.56 $\pm$ 23.65              | .0581 $\pm$ .0264      | 57.57 $\pm$ 28.34              | .0617 $\pm$ .0299      |

**Table S.3**

Absolute area difference of individual sulci between before and after spherical mapping in pediatric and adult cohorts. In the left (right) hemisphere, the average absolute difference of the whole sulci across the 96 subjects between the cortical surface area and associated spherical area is  $112.17 \pm 20.40 \text{ mm}^2$  ( $116.81 \pm 19.92 \text{ mm}^2$ ), which is equivalent to  $.1202 \pm .0180\%$  ( $.1247 \pm .0183\%$ ) of the total surface area.
